# Supplementary material for: Closing the loop: recycling of MAPbI3perovskite solar cells
Source: Royal Society of Chemistry journal article supplement (doi:10.1039/d4ee01071j), 2024-01-01
Supplement: d4ee01071j1.pdf [file d4ee01071j1.pdf]

## Supporting information

# Closing the Loop: Circular Recycling of MAPbI<sub>3</sub> Perovskite Solar Cells

Zhenni Wu, Mykhailo Sytnyk, Jiyun Zhang, Gülüsüm Babayeva, Christian Kupfer, Jin Hu, Simon Arnold, Jens Hauch, Christoph Brabec, Ian Marius Peters

## 1 Experimental Procedures

### 1.1 Materials

Indium tin oxide (ITO)/glass substrates were purchased from Advanced Election Technology Co., Ltd. SnO<sub>2</sub> 15% in H<sub>2</sub>O colloidal dispersion was purchased from Alfa Aesar. Methylammonium iodide (MAI, 99.5%) and Spiro-OMeTAD (2-N,2-N',2-N',2-N',7-N,7-N',7-N',7-N'-octakis(4-methoxyphenyl)-9,9'-spirobi[fluorene]-2,2',7,7'-tetramine, 99.5%) were purchased from Xi'an Yuri Solar Co., Ltd (former name: Xi'an Polymer Light Technology Corp., Ltd). Lead iodide (PbI<sub>2</sub>, 99.99%) were purchased from TCL Development Co., Ltd. Ethanol (>98%, technical, denatured) was purchased from Carl Roth. Chlorobenzene (anhydrous, 99.8%), isopropanol (ACS reagent), ethyl acetate (anhydrous, 99.8%), N-Methyl-2-Pyrrolidone (NMP, anhydrous, 99.5%), 4-tert-butylpyridine (tBP), N,N-dimethylformamide (DMF, anhydrous, 98%),  $\gamma$ -Butyrolactone (GBL, 99%), Dichloromethane (DCM), lithium bis(trifluoromethylsulphonyl)imide (Li-TFSI, 99.95%), tris(2-(1Hpyrazol-1-yl)-4-tert-butylpyridine)cobalt(III) bis(tri-fluoromethylsulphonyl)imide (FK209 Co (III) TFSI salt) and acetonitrile (anhydrous, 99.8%) were purchased from Sigma Aldrich. Silica gel (60A, 40-63u) was purchased from Fluorochem. Deionized water was obtained with an in-house filter. Acetone ( $\geq$  99%, technical) and isopropanol ( $\geq$  98%, technical) for cleaning was purchased from VMR.

### 1.2 Solution preparation

SnO<sub>2</sub> solution was prepared by dispersing 1 mL SnO<sub>2</sub> colloidal dispersion into 5 mL mixture of deionized water and isopropanol ( $V_{\text{water}}:V_{\text{isopropanol}} = 1:1$ ) to achieve a diluted 2.5% concentration. 1.5 M fresh MAPbI<sub>3</sub> solution was prepared by mixing 1.5 mmol MAI and 1.5 mmol PbI<sub>2</sub> in 1 mL mixture of DMF and NMP ( $V_{\text{DMF}}:V_{\text{NMP}} = 4:1$ ). The solution is then stirred for 1 hour at 70 °C. 1.5 M recycled MAPbI<sub>3</sub> solution was prepared by dissolving 1.5 mmol recycled MAPbI<sub>3</sub> in 1 mL of mixed DMF and NMP ( $V_{\text{DMF}}:V_{\text{NMP}} = 4:1$ ), which was also stirred for 1 hour at 70 °C. To prepare Spiro-OMeTAD solution, 72.3 mg Spiro-OMeTAD was dissolved into 1 mL chlorobenzene, followed by adding 17.5  $\mu$ L Li-TFSI solution (520 mg/mL in acetonitrile), 28.8  $\mu$ L tBP and 28.8  $\mu$ L FK209 Co (III) TFSI solution (300 mg/mL in acetonitrile) in sequence.

### 1.3 Device fabrication

ITO/glass substrates were sonicated in acetone and then isopropanol for 20 min each, followed by drying with a N<sub>2</sub> stream and then 5 min O<sub>2</sub> plasma treatment. SnO<sub>2</sub> solution was filtered with a nylon filter (pore size: 0.20  $\mu$ m) and sonicated for a few seconds. 80  $\mu$ L SnO<sub>2</sub> solution was spin-coated at 4000 rpm for 20 s onto an ITO/glass substrate or a recovered ITO/SnO<sub>2</sub> sample from old devices in air

and then annealed at 150 °C for 20 min. After electron transport layer deposition (SnO<sub>2</sub> deposition), the substrates were transferred to a N<sub>2</sub>-filled glovebox for the following layers. Perovskite solutions were filtered through 0.20 μm polytetrafluoroethylene (PTFE) filters before use. Subsequently, 50 μL perovskite solution was spun onto ITO/SnO<sub>2</sub> substrates at 1000 rpm for 10 s, and then 4000 rpm for 40 s. During the second step, 300 μL chlorobenzene was dropped continuously onto the film at 30 s, followed by annealing at 110 °C for 10 min. Then ITO/SnO<sub>2</sub>/perovskite substrate was coated with a layer of Spiro-OMeTAD (50 μL) at 5000 rpm for 40 s with no post-annealing. This layer was coated dynamically – Spiro-OMeTAD was cast on the sample when the spin coater was already on. Subsequently, the samples coated with Spiro-OMeTAD were stored overnight in low humidity conditions for the oxidation of Spiro-OMeTAD to take place. Lastly, a layer of Au electrode was deposited on the sample via thermal evaporation. The effective device area is 0.063 cm<sup>2</sup>. For devices made with recycled components, all the parameters are the same as for devices made with virgin components.

## 1.4 Recycling

### Spiro-OMeTAD

Big pseudo-modules (125 mm\*85 mm) were prepared for the recycling of Spiro-OMeTAD. The structure of pseudo-module is ITO/SnO<sub>2</sub>/MAPbI<sub>3</sub>/ Spiro-OMeTAD. Au deposition was excluded for pseudo-modules. SnO<sub>2</sub>, MAPbI<sub>3</sub> and Spiro-OMeTAD were deposited via drop-casting or doctor blade coating. Spiro-OMeTAD was dissolved with chlorobenzene. Then flash column chromatography was carried out to purify the harvested Spiro-OMeTAD solution (the eluent (DCM: EA=19:1) was selected via thin layer chromatography). We employed 20 ml syringes as chromatography columns, using approximately 6 g of silica gel, to separate around 100-200 mg of Spiro-OMeTAD (estimated quantity). We then concentrated Spiro-OMeTAD with a rotary evaporator, followed by drying in vacuum at room temperature. Additional FK209 Co (III) TFSI, Li-TFSI and tBP were added to prepare Spiro-OMeTAD solution for cell fabrication.

### MAPbI<sub>3</sub>

MAPbI<sub>3</sub> was collected from pseudo-modules as well. To dissolve MAPbI<sub>3</sub>, we used pipettes to apply a minimal amount of GBL onto the modules, which were positioned almost vertically and placed in a petri dish. Ethyl acetate, as the anti-solvent, was added into the obtained solution till the precipitates no longer showed significant increase (the amount of ethyl acetate was roughly 3 times as high as that of GBL). It should be noted that the whole process was done in a glovebox to minimize contact with air and thus iodine loss. Also, it would be better to use oxygen-free ethyl acetate. Afterward, recycled MAPbI<sub>3</sub> was collected via centrifugation at 5000 rpm for 3 min, followed by drying in vacuum for at least 24 hours at room temperature.

### ITO/SnO<sub>2</sub> and Au

ITO/SnO<sub>2</sub> and Au were harvested from old functional devices (25mm\*25mm) stored in a glovebox. Spiro-OMeTAD was dissolved by swirling the device in chlorobenzene or ethyl acetate for about 5 min. Then the sample was swirled in GBL for 2 min to remove MAPbI<sub>3</sub>. Au was fallen into the solution and naturally separated from the substrate. The gold flakes were collected via filtration. The obtained ITO/SnO<sub>2</sub> substrate was washed with ethanol and dried with a gentle N<sub>2</sub> stream.

## 1.5 Characterization

The current-voltage characteristics of the solar cells were measured using a Keithley 7001 Switch System and a Keysight B2901A Precision Source/Measure Unit. The Keithley 7001 facilitated the selection and switching between different cells on a sample automatically. Meanwhile, the Keysight B2901A was employed to apply a controlled voltage to the cells and measure the resultant currents. The measurements were carried out under illumination of  $100 \text{ mW cm}^{-2}$  AM1.5 G (Wavelabs Sinus-70 light engine). Light intensity was calibrated with a crystalline Si cell. The current voltage characteristics were scanned from 1.2 to -0.6 V (reverse scan), with a scan step of 40 mV.

UV-Vis spectra were acquired with a PerkinElmer lambda 950, using a 150 mm integrating sphere. The absorbance spectra of Spiro-OMeTAD were recorded in the wavelength range of 300–600 nm, while the transmittance spectra of MAPbI<sub>3</sub> were measured from 400 to 850 nm. Fresh and recycled Spiro-OMeTAD HTM solutions, doped with additives, were statically spin-coated on ITO glasses at 4000 rpm for 30s, followed by annealing at 75 °C for 5 min. Both fresh and recycled MAPbI<sub>3</sub> films were spin-coated on common glass substrates using the same parameters as employed for MAPbI<sub>3</sub> layers in solar cell devices (detailed in the Device fabrication section).

X-ray diffraction (XRD) measurements were carried out with classical ex situ Bragg-Brentano geometry using a PANalytical X'pert powder diffractometer with filtered Cu-K $\alpha$  radiation ( $\lambda = 1.54178 \text{ \AA}$ ) and an X'Celerator solid-state stripe detector operated at 40 kV and 30 mA. The XRD patterns were collected from 10 to 50°, with a step size of 0.0394°. The miller indices of MAPbI<sub>3</sub> were assigned using the software Mercury based on a crystallographic information file (CIF) downloaded from the Crystallography Open Database (COD) (<http://www.crystallography.net/cod>). The COD ID is 4124388. Both fresh and recycled MAPbI<sub>3</sub> films were prepared following the same procedures employed for MAPbI<sub>3</sub> films intended for UV-Vis measurements.

Time-integrated photoluminescence and time-resolved photoluminescence spectra were recorded with PicoQuant Fluotime 300 at room temperature and in air. The time-integrated photoluminescence spectra were recorded from 450 to 900 nm. A diode laser (LDH-P-C-405B) was employed to excite the samples at 402.2 nm, using a repetition rate of 0.2 MHz and a FWHM of 50 ps. The laser beam area is  $7540 \text{ }\mu\text{m}^2$ . The exciton carrier density for both the fresh and recycled MAPbI<sub>3</sub> film is  $4.040\text{E}+22 \text{ e/cm}^3$ . To mitigate the effects of photo-brightening and ensure reliable results, the measurement protocol included performing three replicates to achieve overlapping spectra. If overlap was not observed, the method necessitated shifting to an unexposed spot and reducing the laser intensity to secure three matching spectra. Figure S14 shows the TR-PL spectra for fresh and recycled MAPbI<sub>3</sub> measured three times consecutively at the same spot. The spectrum presented in the main article is one of the overlapped spectra. Casting procedures for both fresh and recycled MAPbI<sub>3</sub> films mirrored those utilized for MAPbI<sub>3</sub> designated for UV-Vis measurements. The MAPbI<sub>3</sub> films were coated on common glasses.

Scanning electron microscope images were taken at 15 kV acceleration voltage using a JEOL JSM-7610F Schottky Field Emission Scanning Electron Microscope, with a SEI detector and a working distance around 6 mm. The ITO/SnO<sub>2</sub> glass samples were mounted on a specimen stage with carbon tapes and silver pastes.

Optical images of solar cells were captured using a Zeiss Axio Imager.M1 microscope at a 2.5x magnification.

## 1.6 Notes

Language models, ChatGPT and Claude, were used when drafting this manuscript to improve readability and language.

**Table S1:** Summary of previous reports. CB: Chlorobenzene; EA: ethyl acetate; in the ‘Recycled Layer and Ratio’ column, the numerators in fractions represent the count of recycled layers, and the denominators indicate the total number of layers in the solar device; %: the metrics (PCE,  $J_{sc}$ ,  $V_{oc}$  and FF) of a device with recycled materials divided by the same metrics of a device with fresh materials (reference); savings: reduced cost of a recycled device/the cost of the reference; recycled mass (%): recycled mass/material on stack.

| Recycling method                                                                                                                                                  | Recycled Layer and Ratio                                                                      | PCE (%) | $J_{sc}$ (%) | $V_{oc}$ (%) | FF (%) | Savings (%)                                                 | Recycled mass (%)                                                      | Ref       |
|-------------------------------------------------------------------------------------------------------------------------------------------------------------------|-----------------------------------------------------------------------------------------------|---------|--------------|--------------|--------|-------------------------------------------------------------|------------------------------------------------------------------------|-----------|
| DMF/GBL/DMSO » rinsing                                                                                                                                            | FTO glass, mpTiO <sub>2</sub> ; 2/5                                                           | 99.56   | 100.35       | 101.98       | 97.14  | N/A                                                         | N/A                                                                    | [1]       |
| CB » EtOH » DMF » EtOH washing                                                                                                                                    | FTO glass, TiO <sub>2</sub> ; 2/5                                                             | 99.38   | 89.14        | 99.07        | 108.96 | N/A                                                         | N/A                                                                    | [2]       |
| DMF » CB » washing                                                                                                                                                | FTO glass; 1/4                                                                                | 91.46   | 96.16        | 96.94        | 97.06  | N/A                                                         | N/A                                                                    | [3]       |
| Tape » DMSO/DMF » washing                                                                                                                                         | SnO <sub>2</sub> , ITO glass; 2/6                                                             | 100     | 100.40       | 97.37        | 102.75 | N/A                                                         | N/A                                                                    | [4]       |
| Tape » CB » heat » in situ MAI solution coating                                                                                                                   | FTO, TiO <sub>2</sub> , PbI <sub>2</sub> ; 2.5/5                                              | 103.41  | 101.31       | 98.99        | 103.12 | N/A                                                         | N/A                                                                    | [5]       |
| Heat » DMF » ion exchange resin for Pb » Pb <sup>2+</sup> + I <sup>-</sup> » PbI <sub>2</sub>                                                                     | ITO glass, back glass; 2/8                                                                    | ~95     | N/A          | N/A          | N/A    | N/A                                                         | N/A (material cost of a virgin module and recycling cost are provided) | [6]       |
|                                                                                                                                                                   | Pb; 0.5/8                                                                                     | 97.14   | N/A          | N/A          | N/A    |                                                             |                                                                        |           |
| DMF » NH <sub>3</sub> ·H <sub>2</sub> O » HI » PbI <sub>2</sub>                                                                                                   | FTO glass, c-TiO <sub>2</sub> , m-TiO <sub>2</sub> ; 3/5                                      | 98.5    | 104.19       | 0.98         | 96.84  | N/A                                                         | N/A                                                                    | [7]       |
|                                                                                                                                                                   | Pb; 0.5/5                                                                                     | 93.34   | 98.32        | 94.57        | 99.95  |                                                             |                                                                        |           |
| Tape » CB » H <sub>2</sub> O » cooling crystallization for PbI <sub>2</sub>                                                                                       | FTO glass; 1/5                                                                                | 103.4   | 102.08       | 101.94       | 98.63  | N/A                                                         | N/A                                                                    | [8]       |
|                                                                                                                                                                   | PbI <sub>2</sub> ; 0.5/5                                                                      | 92.47   | 96.39        | 99.03        | 94.59  |                                                             |                                                                        |           |
| Butylamine » heat » toluene » EtOH » PbI <sub>2</sub> crystallization to MAPbI <sub>3</sub> crystals                                                              | ITO glass, NiO <sub>x</sub> , PbI <sub>2</sub> ; 2.5/5                                        | 100.62  | 100.33       | 100          | 99.10  | N/A                                                         | N/A                                                                    | [9]       |
| Methylamine + THF » cleaning for ITO/SnO <sub>2</sub> and Au » Au melting » ACN for MAPbI <sub>3-x</sub> Br <sub>x</sub> » EA extraction for Spiro-OMeTAD         | ITO glass, SnO <sub>2</sub> , MAPbI <sub>3-x</sub> Br <sub>x</sub> , Spiro-OMeTAD and Au; 5/5 | 99.04   | 99.56        | 99.74        | 99.63  | N/A                                                         | N/A                                                                    | [10]      |
| CB » GBL » EtOH washing » chromatography for Spiro-OMeTAD » anti-solvent crystallization for MAPbI <sub>3</sub> » fresh SnO <sub>2</sub> for ITO/SnO <sub>2</sub> | ITO glass, SnO <sub>2</sub> , MAPbI <sub>3</sub> , Spiro-OMeTAD ; 4/5                         | 97.16   | 97.21        | 99.08        | 101.33 | 63.7 at lab scale; 92.4 (Au), 61.4 (Ag) at industrial scale | 99.97                                                                  | This work |

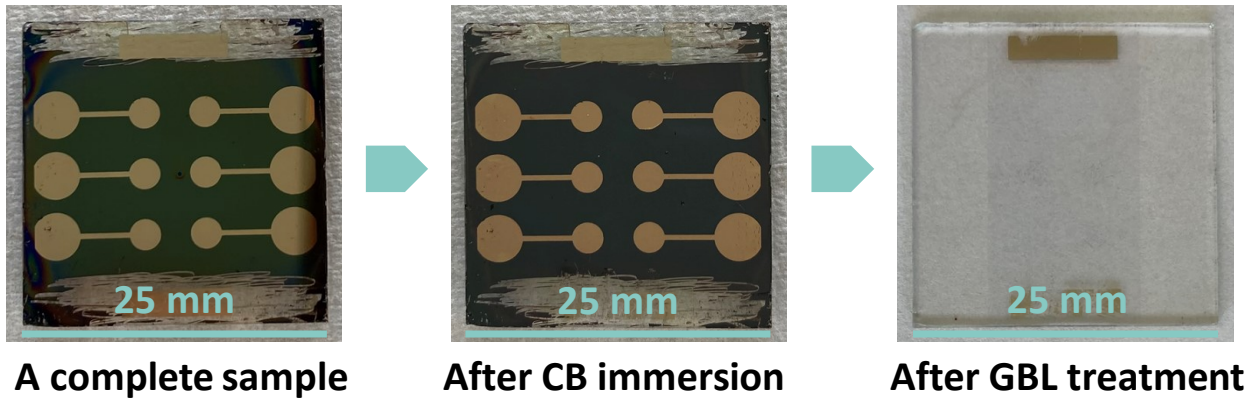

F

**Figure S1:** Photographs of a sample at different stages of recycling. CB: chlorobenzene. The Au stripes at the sides of a recovered or a recycled ITO/SnO<sub>2</sub> were scraped off before thermal evaporation as for a sample with a fresh substrate.

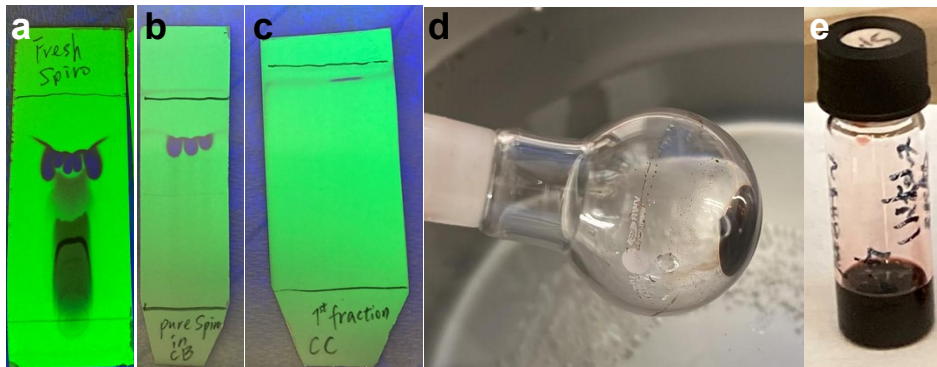

**Figure S2:** Thin-layer chromatography plates for a) fresh Spiro-OMeTAD doped with additives, b) pure Spiro-OMeTAD and c) column purified recycled Spiro-OMeTAD; d) recycled Spiro-OMeTAD after rotary evaporation; e) fresh Spiro-OMeTAD solution.

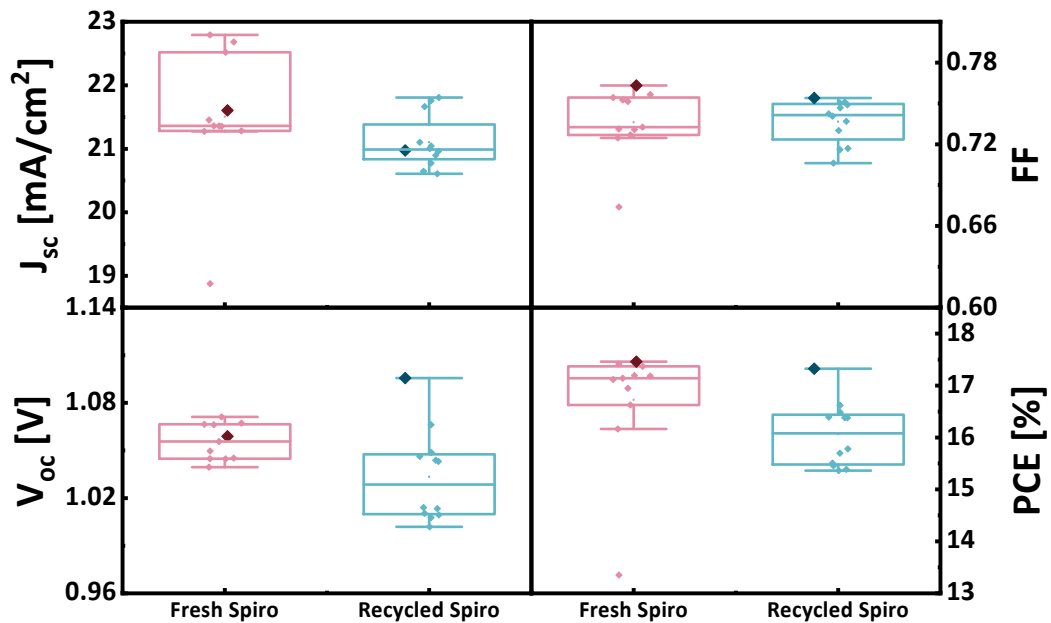

**Figure S3 :**  $J_{sc}$ ,  $V_{oc}$ , FF and PCE of 12 solar cells using fresh Spiro-OMeTAD versus using recycled Spiro-OMeTAD. The magnified data points in a darker hue are the champion devices shown in the main article.

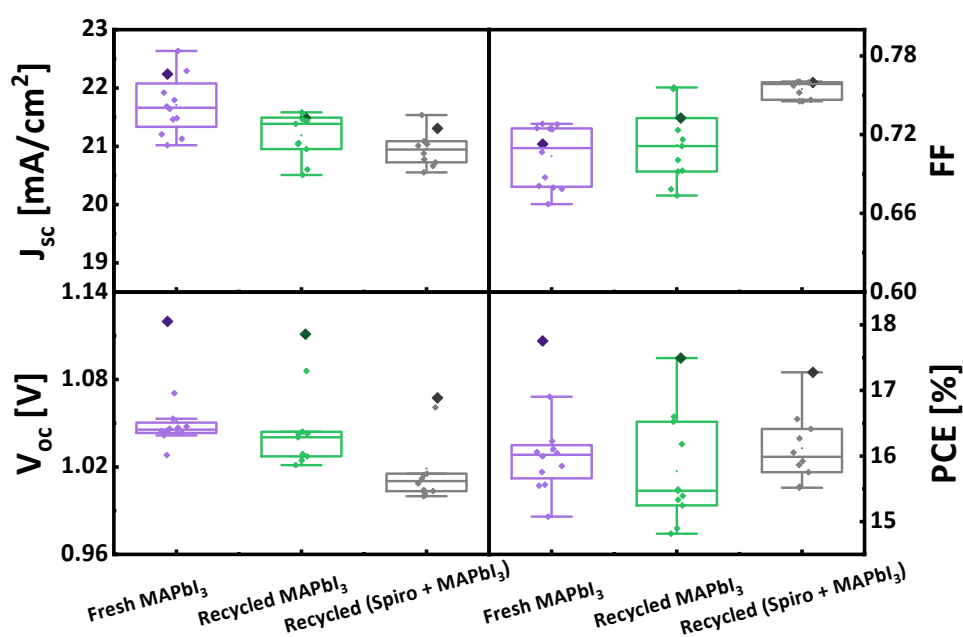

**Figure S4 :**  $J_{sc}$ ,  $V_{oc}$ , FF and PCE of 12 solar cells made with fresh  $\text{MAPbI}_3$  versus recycled  $\text{MAPbI}_3$  versus recycled  $\text{MAPbI}_3$  and Spiro-OMeTAD. The magnified data points in a darker hue are the champion devices shown in the main article.

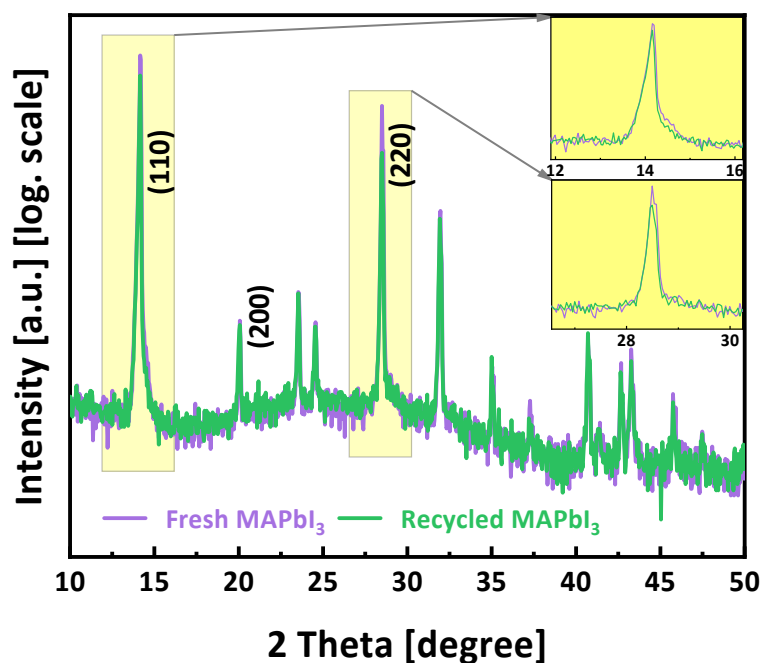

**Figure S5:** Superimposed XRD patterns of fresh and recycled  $\text{MAPbI}_3$  films on common glass, with insets highlighting zoomed-in peak comparisons.

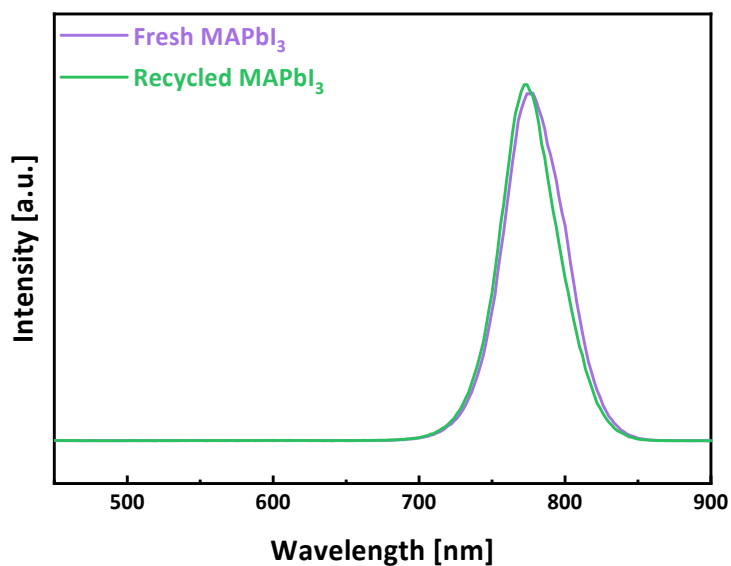

**Figure S6:** TI-PL spectra of fresh and recycled  $\text{MAPbI}_3$  films on common glass.

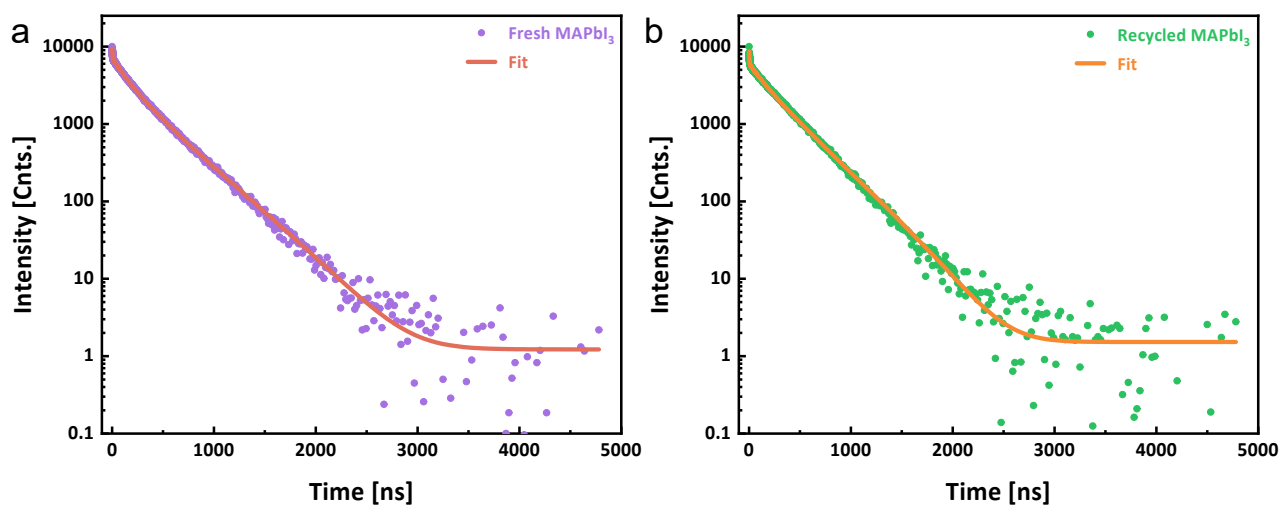

**Figure S7 :** Fitted TR-PL spectra for fresh and recycled  $\text{MAPbI}_3$  films.



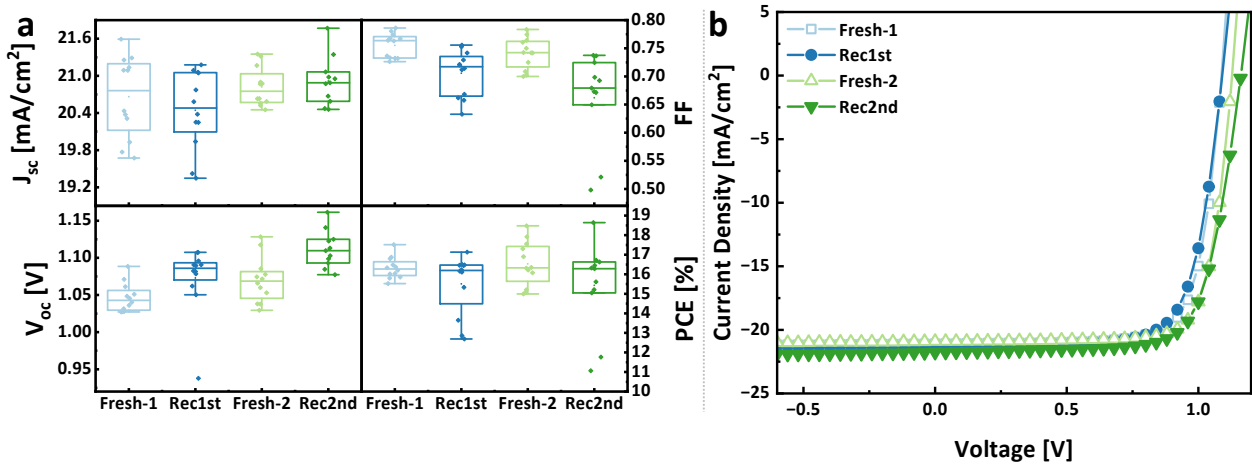

**Figure S8:** Two-cycle recycling of ITO/SnO<sub>2</sub>: a)  $J_{sc}$ ,  $V_{oc}$ , FF and PCE of 12 solar cells made with ITO/SnO<sub>2</sub> recycled once (Rec1st) versus ITO/SnO<sub>2</sub> recycled twice (Rec2nd) versus fresh materials (Fresh-1 is for comparison with Rec1st — both made in the same batch, Fresh-2 is for comparison with Rec2nd); b) JV curves of the champion devices.

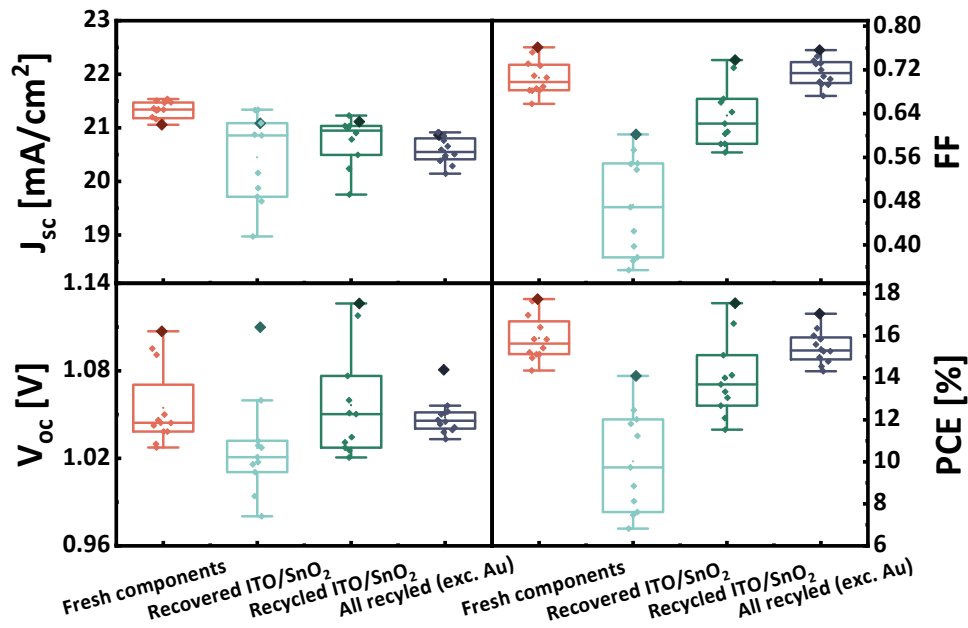

**Figure S9 :**  $J_{sc}$ ,  $V_{oc}$ , FF and PCE of 12 solar cells made with fresh components exclusively versus recovered ITO/SnO<sub>2</sub> versus recycled ITO/SnO<sub>2</sub> (recovered ITO/SnO<sub>2</sub> deposited with fresh SnO<sub>2</sub>) versus recycled MAPbI<sub>3</sub>, Spiro-OMeTAD and ITO/SnO<sub>2</sub>. The magnified data points in a darker hue are the champion devices shown in the main article.

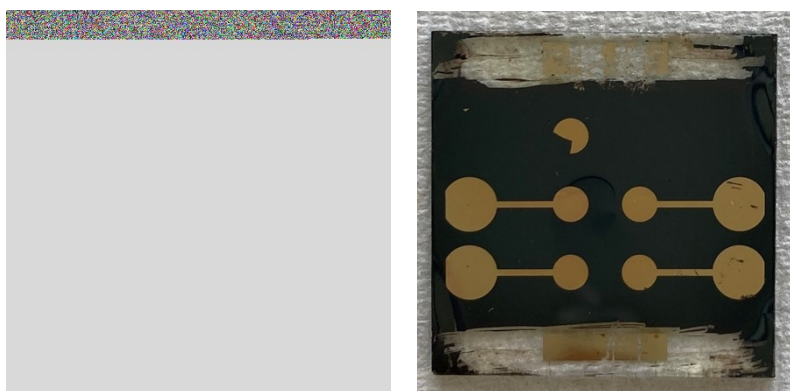

**Figure S10:** Two perovskite solar samples after chlorobenzene treatment.

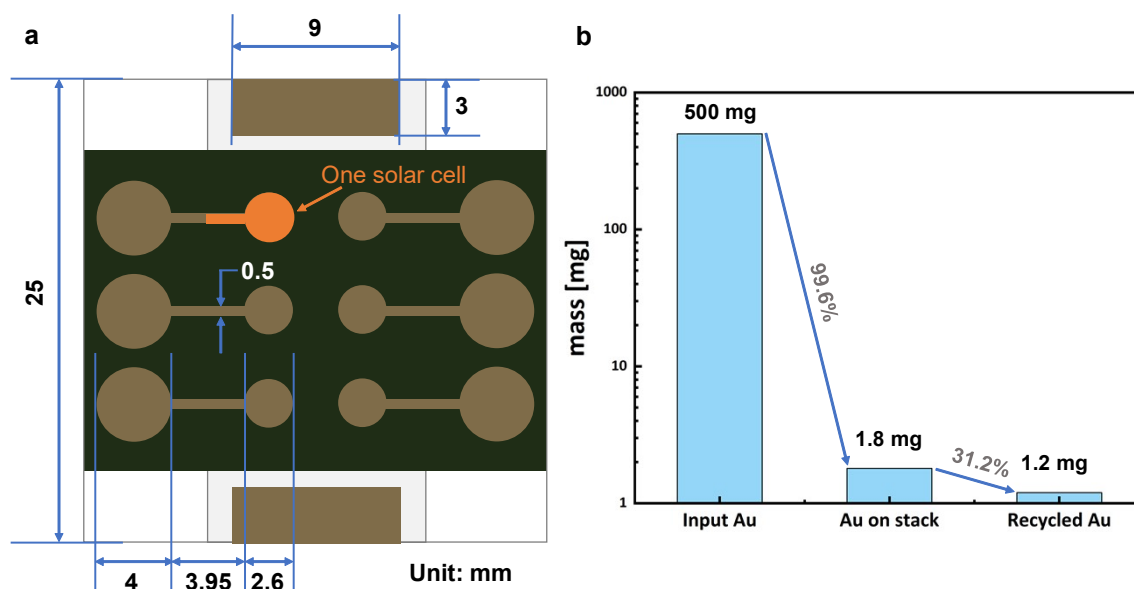

**Figure S11:** a) Designed dimensions of a perovskite solar sample consisting of six individual cells (the area highlighted in orange denotes a single solar cell); b) Mass flow of gold per batch (18 samples), from input to recycling.

**Table S2:** The lab-scale cost comparison between a 1 m<sup>2</sup> hybrid module and a fresh one.

| Layer              | COST (\$)          |                     |
|--------------------|--------------------|---------------------|
|                    | Fresh [ $C_{VL}$ ] | Hybrid [ $C_{HL}$ ] |
| ITO glass          | 244.30             | 0.37                |
| SnO <sub>2</sub>   | 0.17               | 0.17                |
| MAPbI <sub>3</sub> | 7.62               | 6.5                 |
| Spiro-OMeTAD       | 79.01              | 46.8                |
| Au                 | 104.02             | 104.02              |
| Combined           | 435.12             | 157.86              |

The cost of hybrid MAPbI<sub>3</sub> layer and hybrid Spiro-OMeTAD layer can be deduced by:

$$C_{HL} = C_{VL} - (C_{Vc} - C_{Hc}) \quad (1)$$

where  $C_{HL}$  is the cost of a hybrid layer,  $C_{VL}$  is the cost of a virgin layer,  $C_{Vc}$  is the cost of virgin component, and  $C_{Hc}$  is the total cost of one component for a hybrid module.  $C_{Vc}$  and  $C_{VL}$  can be found in Table 2.

**Table S3:** Material expenses, generated waste and waste management costs in our labs in Erlangen, 2021 – 2022.

| Total estimated researchers focusing on experiments |            | 50         |            |            |  |
|-----------------------------------------------------|------------|------------|------------|------------|--|
| Lab                                                 | i-MEET     |            | HTM PV     |            |  |
| Year                                                | 2021       | 2022       | 2021       | 2022       |  |
| Expenses on TCO glasses                             | 3,745.2 €  | 4,258 €    | 1,260 €    | 7,214.0 €  |  |
| Total expenses for materials                        | 60,248.7 € | 51,891.5 € | 53,268.0 € | 55,459.5 € |  |
| Amount of generated waste                           | 900 L      | 1290 L     | 371 kg     | 456 kg     |  |
| Expenses for waste management                       | N/A        | N/A        | 1,757.2 €  | 2001,4 €   |  |

**Table S4:** Material price estimates for purchase quantities required when scaling up solar panel production ten thousand times. The purchase volume here is the closest to the required volume available, while maintaining the material grades identical to those used in our experiments. A 10% price learning was adopted based on literature [11], and accounts for the material price estimates. As for Au and Ag, the cost reduction for every doubling is not practical due to their unique value. Spiro-OMeTAD is a highly expensive HTM in the current market, and thus a more sustainable and cheaper synthesis is assumed to be utilized instead [12].

| Material                  | Usage for 1 m <sup>2</sup> | unit           | purchase volume | price (\$) | price per unit (\$/unit) | required volume for 10000 m <sup>2</sup> | # Doublings | calculated price per unit (\$/unit) [ $P_V$ ] | source              |
|---------------------------|----------------------------|----------------|-----------------|------------|--------------------------|------------------------------------------|-------------|-----------------------------------------------|---------------------|
| ITO glass                 | 1                          | m <sup>2</sup> | \               | \          | \                        | 10000                                    | \           | 7 (front glass) + 1.30 (ITO)                  | [13]                |
| Deionized water           | 33                         | mL             | \               | \          | \                        | 330000                                   | \           | 0.000012                                      | [14]                |
| Acetone                   | 33                         | mL             | 200000          | 1436.4     | 0.0072                   | 330000                                   | 0.73        | 0.0067                                        | VMR                 |
| Isopropanol               | 33                         | mL             | 10000           | 85.17      | 0.0085                   | 330000                                   | 5.05        | 0.0051                                        | VMR                 |
| SnO <sub>2</sub> (15 %)   | 0.58                       | g              | 2000            | 259.2      | 0.13                     | 5800                                     | 1.54        | 0.11                                          | VMR                 |
| Deionized water           | 1.25                       | mL             | \               | \          | \                        | 12500                                    | \           | 0.000012                                      | [14]                |
| Isopropanol               | 1.25                       | mL             | 20000           | 574.56     | 0.029                    | 12500                                    | \           | 0.029                                         | Sigma               |
| MAI                       | 0.14                       | g              | 10              | 75         | 7.5                      | 1400                                     | 7.13        | 3.54                                          | Xi'an Yuri          |
| PbI <sub>2</sub>          | 1.38                       | g              | 25              | 58         | 2.32                     | 13800                                    | 9.11        | 0.89                                          | Xi'an Yuri          |
| DMF                       | 2.4                        | mL             | 45000           | 2106       | 0.047                    | 24000                                    | \           | 0.047                                         | Sigma               |
| NMP                       | 0.6                        | mL             | 18000           | 509.76     | 0.028                    | 6000                                     | \           | 0.028                                         | Sigma               |
| Spiro-OMeTAD (alt. synt.) | 0.774                      | g              | 1               | 31.76      | 31.76                    | 7740                                     | 12.92       | 8.14                                          | [12]                |
| LITFSI                    | 0.097                      | g              | 250             | 1123.2     | 4.49                     | 970                                      | 1.96        | 3.66                                          | Sigma               |
| FK 209 Co (III) TFSI      | 0.092                      | g              | 500             | 5318.1     | 10.64                    | 920                                      | 0.88        | 9.69                                          | Greatcellsolar      |
| Acetonitrile              | 0.495                      | mL             | 2000            | 264.6      | 0.13                     | 4950                                     | 1.31        | 0.12                                          | Sigma               |
| Chlorobenzene             | 10.7                       | mL             | 1000            | 246.24     | 0.25                     | 107000                                   | 6.75        | 0.12                                          | Sigma               |
| tBP                       | 0.284                      | g              | 500             | 816.48     | 1.63                     | 2840                                     | 2.51        | 1.25                                          | Sigma               |
| Au                        | 1.65                       | g              | 1               | 63.04      | \                        | \                                        | \           | 63.04                                         | Market price        |
| Ag                        | 2.5 [13]                   | g              | 1               | 0.73       | \                        | \                                        | \           | 0.73                                          | Market price        |
| Ethanol                   | 33                         | mL             | 200000          | 970.92     | 0.0049                   | 330000                                   | 0.73        | 0.0045                                        | Carl Roth           |
| SnO <sub>2</sub> (15 %)   | 3.32                       | g              | 2000            | 259.2      | 0.13                     | 33206                                    | 4.06        | 0.0855                                        | VMR                 |
| Deionized water           | 7.21                       | mL             | \               | \          | \                        | 72100                                    | \           | 0.000012                                      | [14]                |
| Isopropanol               | 7.21                       | mL             | 20000           | 574.56     | 0.029                    | 72100                                    | 1.85        | 0.024                                         | Sigma               |
| GBL                       | 3.05                       | g              | 20000           | 662.04     | 0.033                    | 30500                                    | 0.61        | 0.031                                         | Sigma               |
| Ethyl acetate             | 8.2                        | mL             | 2000            | 240.84     | 0.12                     | 82000                                    | 5.36        | 0.069                                         | Sigma               |
| Chlorobenzene             | 1.9                        | mL             | 1000            | 246.24     | 0.25                     | 19000                                    | 4.25        | 0.16                                          | Sigma               |
| Silica gel                | 14                         | g              | 20000           | 698        | 0.035                    | 140000                                   | 2.81        | 0.026                                         | Goldleaf Scientific |
| DCM                       | 133                        | mL             | 205000          | 2308.8     | 0.011                    | 1330000                                  | 2.7         | 0.0085                                        | Chem Impex          |
| Ethyl acetate             | 7                          | mL             | 20000           | 629.64     | 0.031                    | 70000                                    | 1.81        | 0.0261                                        | Sigma               |

**Table S5:** Material costs to prepare a 1 m<sup>2</sup> solar panel based on the price estimates in Table S3.

| Layer              | Material                  | Usage for 1 m <sup>2</sup> | unit           | calculated price per unit (\$/unit) [ $P_{Vj}$ ] | Subtotal cost (\$) [ $C_{Vc}$ ] | Total cost per layer (\$) [ $C_{VL}$ ] |
|--------------------|---------------------------|----------------------------|----------------|--------------------------------------------------|---------------------------------|----------------------------------------|
| ITO glass          | ITO glass                 | 1                          | m <sup>2</sup> | 7 (front glass) + 1.30 (ITO)                     | 8.3                             | 8.69                                   |
|                    | Deionized water           | 33                         | mL             | 0.000012                                         | 0.0004                          |                                        |
|                    | Acetone                   | 33                         | mL             | 0.0067                                           | 0.22                            |                                        |
|                    | Isopropanol               | 33                         | mL             | 0.0051                                           | 0.17                            |                                        |
| SnO <sub>2</sub>   | SnO <sub>2</sub> (15 %)   | 0.58                       | g              | 0.11                                             | 0.064                           | 0.10                                   |
|                    | Deionized water           | 1.25                       | mL             | 0.000012                                         | 0.00002                         |                                        |
|                    | Isopropanol               | 1.25                       | mL             | 0.029                                            | 0.036                           |                                        |
| MAPbI <sub>3</sub> | MAI                       | 0.14                       | g              | 3.54                                             | 0.50                            | 1.85                                   |
|                    | PbI <sub>2</sub>          | 1.38                       | g              | 0.89                                             | 1.23                            |                                        |
|                    | DMF                       | 2.4                        | mL             | 0.047                                            | 0.11                            |                                        |
|                    | NMP                       | 0.6                        | mL             | 0.028                                            | 0.017                           |                                        |
| Spiro-OMeTAD       | Spiro-OMeTAD (alt. synt.) | 0.774                      | g              | 8.14                                             | 6.30                            | 9.26                                   |
|                    | LiTFSI                    | 0.097                      | g              | 3.66                                             | 0.35                            |                                        |
|                    | FK 209 Co (III) TFSI      | 0.092                      | g              | 9.69                                             | 0.89                            |                                        |
|                    | Acetonitrile              | 0.495                      | mL             | 0.12                                             | 0.057                           |                                        |
|                    | Chlorobenzene             | 10.7                       | mL             | 0.12                                             | 1.29                            |                                        |
|                    | tBP                       | 0.284                      | g              | 1.25                                             | 0.36                            |                                        |
| Au                 | Au                        | 1.65                       | g              | 63.04                                            | 104                             | 104                                    |
| Ag                 | Ag                        | 2.5 [14]                   | g              | 0.73                                             | 1.83                            | 1.83                                   |

**Table S6:** Recycling costs for a 1 m<sup>2</sup> solar panel based on price estimates in Table S3. At an industrial scale, the ample availability of recovered metal electrodes eliminates the restriction of reuse from the limited lab-scale recovery. After the recovery process, the electrodes should be subjected to a sequential cleaning procedure involving chlorobenzene, GBL, and ethanol to remove any residual HTM and perovskite. The quantities of chlorobenzene and GBL used are assumed to be consistent with those required for the respective layer recycling processes. Ethanol is employed as the final cleaning agent, and a volume of 10 mL should be sufficient for cleaning 1-2 grams of electrodes. For recycling at this scale, the likelihood of the utilized solvents being recycled and reused is high, thus we include a scenario where the solvents for recycling are recycled and reused with a reuse rate of 90%, and replaced with fresh solvents every 5 m<sup>2</sup>. The recycled solvents include ethanol, GBL, ethyl acetate, chlorobenzene, and dichloromethane.

| Target material                    | Chemical               | Unit | Calculated price per unit (\$/unit) [ $P_V$ ] | Usage [ $U$ ] | Subtotal cost (\$) | Total cost (\$) [ $C_R$ ] | Usage [ $U_{SR}$ ] | Subtotal cost (\$) if sol rec [ $C_{SR}$ ] | Total cost (\$) if sol rec [ $C_R$ ] |
|------------------------------------|------------------------|------|-----------------------------------------------|---------------|--------------------|---------------------------|--------------------|--------------------------------------------|--------------------------------------|
| <b>SnO<sub>2</sub> + ITO glass</b> | Ethanol                | mL   | 0.0045                                        | 33            | 0.15               | 0.25                      | 9.24               | 0.042                                      | 0.14                                 |
|                                    | SnO <sub>2</sub> (15%) | g    | 0.11                                          | 0.58          | 0.064              |                           | 0.58               | 0.064                                      |                                      |
|                                    | Deionized water        | mL   | 0.000012                                      | 1.25          | 0.00002            |                           | 1.25               | 0.00002                                    |                                      |
|                                    | Isopropanol            | mL   | 0.029                                         | 1.25          | 0.036              |                           | 1.25               | 0.036                                      |                                      |
| <b>MAPbI<sub>3</sub></b>           | GBL                    | g    | 0.031                                         | 3.05          | 0.095              | 0.66                      | 0.854              | 0.027                                      | 0.18                                 |
|                                    | Ethyl acetate          | mL   | 0.069                                         | 8.2           | 0.56               |                           | 2.296              | 0.16                                       |                                      |
| <b>Spiro-OMeTAD</b>                | Chlorobenzene          | mL   | 0.16                                          | 1.9           | 0.30               | 1.97                      | 0.532              | 0.084                                      | 0.82                                 |
|                                    | Silica gel             | g    | 0.026                                         | 14            | 0.36               |                           | 14                 | 0.36                                       |                                      |
|                                    | Dichloromethane        | mL   | 0.0085                                        | 133           | 1.13               |                           | 37.24              | 0.32                                       |                                      |
|                                    | Ethyl acetate          | mL   | 0.026                                         | 7             | 0.18               |                           | 1.96               | 0.051                                      |                                      |
| <b>Au/Ag</b>                       | Chlorobenzene          | mL   | 0.16                                          | 1.9           | 0.30               | 0.44                      | 0.532              | 0.084                                      | 0.12                                 |
|                                    | GBL                    | g    | 0.031                                         | 3.05          | 0.095              |                           | 0.854              | 0.027                                      |                                      |
|                                    | Ethanol                | mL   | 0.0045                                        | 10            | 0.045              |                           | 2.8                | 0.013                                      |                                      |

*sol rec: solvents are recycled.*

When a solvent is recycled, the cost of this solvent required for 1 m<sup>2</sup> (i.e. Subtotal cost (\$) if sol rec in the Table) can be deduced by:

$$C_{SR} = U_{SR} * P_V = [(U + U * 0.1 * 4)/5] * P_V \quad (2)$$

where  $C_{SR}$  is the cost when the solvent is recycled,  $U_{SR}$  is the usage of a chemical with solvents recycling,  $U$  is the usage of a chemical without solvents recycling,  $P_V$  is the calculated price per unit.  $U_{SR}$ ,  $U$  and  $P_V$  can be found in Table S5.

**Table S7:** The industrial-scale cost comparison between a 1 m<sup>2</sup> hybrid module and a fresh one.

| Layer                      | COST               |                     |                             |
|----------------------------|--------------------|---------------------|-----------------------------|
|                            | Fresh [ $C_{VL}$ ] | Hybrid [ $C_{HL}$ ] | Hybrid-sol rec [ $C_{HL}$ ] |
| ITO glass                  | 8.69               | 0.15                | 0.042                       |
| SnO <sub>2</sub>           | 0.1                | 0.1                 | 0.1                         |
| MAPbI <sub>3</sub>         | 1.85               | 2.25                | 1.77                        |
| Spiro-OMeTAD               | 9.26               | 7.49                | 6.33                        |
| Au                         | 104.02             | 1.49                | 1.17                        |
| Combined (Au as electrode) | 123.92             | 11.48               | 9.412                       |
| Ag                         | 1.83               | 0.46                | 0.14                        |
| Combined (Ag as electrode) | 21.73              | 10.45               | 8.382                       |

The costs of hybrid layers at an industrial scale were calculated in the same way as for the lab scale, with the exception of metal electrodes. We assume a gold recycling rate of 99% for both thermal evaporation losses and solar panels. We applied the same rules for Ag. Thus, the cost of a hybrid electrode is deduced by:

$$C_{He} = C_R + [M_o + M_o * 0.01 * (10000 - 1)] * P_V / 10000 \quad (3)$$

Where  $C_R$  is available in Table S5, while  $M_o$  and  $P_V$  for Au and Ag can be found in Table S3.

**Table S8:** Material on a 1 m<sup>2</sup> module (it is assumed that there is a 10% material loss except for ITO glass and Au in device fabrication, as mentioned in the main article, and 60% material utilization ratio for Au [15]), and the corresponding recycled mass.

| Material             | MASS (g)          |                           |
|----------------------|-------------------|---------------------------|
|                      | Material on stack | recycled mass (lab scale) |
| ITO glass            | 5000              | 5000                      |
| SnO <sub>2</sub>     | 0.078             | 0.078                     |
| MAPbI <sub>3</sub>   | 1.368             | 1.19                      |
| Spiro-OMeTAD         | 0.697             | 0.46                      |
| Au                   | 0.99              | 0                         |
| LiTFSI               | 0.09              | 0                         |
| FK 209 Co (III) TFSI | 0.081             | 0                         |
| <b>Total</b>         | <b>5003.3</b>     | <b>5001.7</b>             |

**Table S9:** Electricity consumption for recycling.

| Recycling target     | steps with electricity consumption | Power (kW) | Time (h) | Electricity (kWh) | overall electricity consumption (kWh) |
|----------------------|------------------------------------|------------|----------|-------------------|---------------------------------------|
| Spiro-OMeTAD         | flash column chromatography        | 0.06       | 100/60   | 0.1               | 4.81                                  |
|                      | Rotary Evaporation                 | 1.4        | 140/60   | 3.27              |                                       |
|                      | vacuum drying                      | 0.06       | 12       | 0.72              |                                       |
| MAPbI <sub>3</sub>   | centrifugation                     | 0.07       | 3/60     | 0.0035            |                                       |
|                      | vacuum drying                      | 0.06       | 12       | 0.72              |                                       |
| ITO/SnO <sub>2</sub> | \                                  | \          | \        | \                 |                                       |



**Table S10:** Characterization factors for raw materials required for a 1 m<sup>2</sup> module (Part I). The primary data were adapted from literature [16]. Due to the absence of sufficient data, FK209 Co(III) TFSI was excluded from our analysis; however, given its low usage of only 0.092 g, its exclusion is expected to have a negligible impact.

| Item            | Unit           | Usage    | Cumulative energy demand (MJ-Eq) | Agricultural land occupation (m <sup>2</sup> a) | Climate change (kg CO <sub>2</sub> -Eq) | Fossil depletion (kg oil-Eq) | Freshwater ecotoxicity (kg 1,4-DCB-Eq) | Freshwater eutrophication (kg P-Eq) | Human toxicity (kg 1,4-DCB-Eq) | Ionising radiation (kg U235-Eq) | Marine ecotoxicity (kg 1,4-DCB-Eq) | Marine eutrophication (kg N-Eq) | Metal depletion (kg Fe-Eq) |
|-----------------|----------------|----------|----------------------------------|-------------------------------------------------|-----------------------------------------|------------------------------|----------------------------------------|-------------------------------------|--------------------------------|---------------------------------|------------------------------------|---------------------------------|----------------------------|
| ITO glass       | m <sup>2</sup> | 1.00E+00 | 2.92E+02                         | 5.40E-02                                        | 1.59E+01                                | 6.87E+00                     | 8.25E-02                               | 1.06E-03                            | 1.66E+02                       | 1.67E-01                        | 6.65E+01                           | 1.51E-02                        | 6.41E-01                   |
| Deionized water | kg             | 3.46E-02 | 8.31E-04                         | 2.78E-06                                        | 5.55E-05                                | 1.60E-05                     | 8.32E-07                               | 2.95E-08                            | 1.10E-03                       | 6.02E-06                        | 9.48E-04                           | 5.95E-08                        | 3.97E-06                   |
| Acetone         | kg             | 2.59E-02 | 1.74E+00                         | 9.88E-06                                        | 5.00E-02                                | 4.00E-02                     | 4.22E-04                               | 4.03E-06                            | 2.75E-02                       | 8.00E-06                        | 5.42E-02                           | 4.68E-05                        | 3.22E-05                   |
| Isopropanol     | kg             | 2.68E-02 | 1.62E+00                         | 9.83E-04                                        | 4.26E-02                                | 3.70E-02                     | 2.48E-04                               | 7.03E-06                            | 4.09E-01                       | 9.87E-04                        | 3.05E-01                           | 2.99E-05                        | 1.73E-03                   |
| Tin oxide       | kg             | 8.70E-05 | 2.36E-02                         | 5.25E-05                                        | 1.44E-03                                | 4.36E-04                     | 1.87E-05                               | 7.21E-07                            | 2.60E-02                       | 2.35E-04                        | 2.17E-02                           | 4.27E-06                        | 1.07E-01                   |
| MAI             | kg             | 1.40E-04 | 4.80E-01                         | 2.26E-03                                        | 2.07E-02                                | 9.55E-03                     | 7.80E-04                               | 1.84E-05                            | 9.15E-01                       | 2.21E-03                        | 6.96E-01                           | 2.94E-05                        | 1.65E-03                   |
| Lead iodide     | kg             | 1.38E-03 | 7.49E-02                         | 1.44E-03                                        | 5.38E-03                                | 1.43E-03                     | 9.83E-05                               | 2.73E-06                            | 2.15E-01                       | 2.64E-04                        | 1.08E-01                           | 7.12E-06                        | 8.72E-04                   |
| DMF             | kg             | 2.47E-03 | 1.92E-01                         | 2.87E-04                                        | 6.39E-03                                | 4.30E-03                     | 8.99E-05                               | 2.43E-06                            | 1.46E-01                       | 6.32E-04                        | 9.51E-02                           | 3.08E-05                        | 4.11E-04                   |
| NMP             | kg             | 5.67E-04 | 6.17E-02                         | 2.05E-04                                        | 3.18E-03                                | 1.67E-03                     | 6.01E-06                               | 1.33E-07                            | 1.20E-02                       | 1.42E-04                        | 4.26E-03                           | 7.34E-07                        | 1.38E-04                   |
| Spiro-OMeTAD    | kg             | 7.74E-04 | 1.52E+00                         | 2.30E-02                                        | 8.51E-02                                | 2.75E-02                     | 5.74E-03                               | 9.90E-05                            | 5.07E+00                       | 8.65E-03                        | 4.29E+00                           | 9.52E-05                        | 3.91E-03                   |
| LiTFSI          | kg             | 9.70E-05 | 6.76E-02                         | 3.57E-04                                        | 3.66E-03                                | 1.45E-03                     | 2.11E-04                               | 4.01E-06                            | 1.80E-01                       | 1.96E-04                        | 1.48E-01                           | 4.39E-06                        | 1.31E-04                   |
| Acetonitrile    | kg             | 3.89E-04 | 4.30E-02                         | 2.39E-05                                        | 1.43E-03                                | 9.87E-04                     | 6.83E-06                               | 1.67E-07                            | 1.12E-02                       | 3.44E-05                        | 8.73E-03                           | 6.54E-06                        | 4.19E-05                   |
| Chlorobenzene   | kg             | 1.18E-02 | 9.29E-01                         | 1.36E-03                                        | 3.26E-02                                | 2.05E-02                     | 1.19E-03                               | 1.57E-05                            | 5.96E-01                       | 1.84E-03                        | 4.86E-01                           | 3.23E-05                        | 1.57E-03                   |
| tBP             | kg             | 2.84E-04 | 5.16E-02                         | 1.75E-04                                        | 2.89E-03                                | 1.06E-03                     | 4.10E-05                               | 1.35E-06                            | 6.11E-02                       | 2.55E-04                        | 4.83E-02                           | 3.55E-06                        | 1.92E-04                   |
| Silver          | kg             | 2.50E-03 | 8.82E+00                         | 2.79E-02                                        | 5.47E-01                                | 1.91E-01                     | 5.32E-01                               | 1.43E-02                            | 1.13E+03                       | 3.96E-02                        | 5.92E+02                           | 4.24E-03                        | 3.46E+00                   |

**Table S11:** Characterization factors for raw materials required for a 1 m<sup>2</sup> module (Part II). The primary data were adapted from literature [16]. Due to the absence of sufficient data, FK209 Co(III) TFSI was excluded from our analysis; however, given its low usage of only 0.092 g, its exclusion is expected to have a negligible impact.

| Item            | Unit           | Usage    | Natural land transformation (m <sup>2</sup> ) | Ozone depletion (kg CFC-11-Eq) | Particulate matter formation (kg PM10-Eq) | Photochemical oxidant formation (kg NMVOC) | Terrestrial acidification (kg SO <sub>2</sub> -Eq) | Terrestrial ecotoxicity (kg 1,4-DCB-Eq) | Urban land occupation (m <sup>2</sup> a) | Water depletion (m <sup>3</sup> ) | Ecosystem quality (points) | Human health (points) | Resources (points) |
|-----------------|----------------|----------|-----------------------------------------------|--------------------------------|-------------------------------------------|--------------------------------------------|----------------------------------------------------|-----------------------------------------|------------------------------------------|-----------------------------------|----------------------------|-----------------------|--------------------|
| ITO glass       | m <sup>2</sup> | 1.00E+00 | 2.61E-03                                      | 1.38E-06                       | 2.00E-02                                  | 4.89E-02                                   | 7.22E-02                                           | 7.88E-03                                | 1.58E-02                                 | 1.02E-02                          | 4.89E-01                   | 1.72E+00              | 8.54E-01           |
| Deionized water | kg             | 3.46E-02 | 7.66E-09                                      | 2.53E-11                       | 1.98E-07                                  | 1.70E-07                                   | 3.06E-07                                           | 4.94E-08                                | 5.29E-07                                 | 4.54E-05                          | 2.60E-06                   | 9.94E-06              | 2.10E-06           |
| Acetone         | kg             | 2.59E-02 | -4.86E-09                                     | 2.47E-11                       | 7.24E-05                                  | 2.35E-04                                   | 2.63E-04                                           | 4.64E-06                                | 4.27E-06                                 | 3.58E-06                          | 1.38E-03                   | 2.15E-03              | 4.79E-03           |
| Isopropanol     | kg             | 2.68E-02 | 3.94E-06                                      | 1.73E-09                       | 6.45E-05                                  | 2.10E-04                                   | 1.81E-04                                           | 1.40E-05                                | 1.39E-04                                 | 1.13E-04                          | 1.47E-03                   | 4.43E-03              | 4.51E-03           |
| Tin oxide       | kg             | 8.70E-05 | 6.21E-06                                      | 1.17E-10                       | 2.22E-05                                  | 1.39E-05                                   | 3.37E-05                                           | 7.82E-07                                | 9.48E-05                                 | 5.11E-06                          | 5.30E-04                   | 2.81E-04              | 5.04E-03           |
| MAI             | kg             | 1.40E-04 | 4.37E-06                                      | 7.48E-09                       | 6.76E-05                                  | 9.10E-05                                   | 1.71E-04                                           | 3.25E-05                                | 3.12E-04                                 | 4.06E-04                          | 1.30E-03                   | 7.14E-03              | 1.22E-03           |
| Lead iodide     | kg             | 1.38E-03 | 9.15E-07                                      | 6.16E-10                       | 1.52E-05                                  | 2.15E-05                                   | 4.31E-05                                           | 7.42E-06                                | 5.55E-05                                 | 1.62E-05                          | 2.64E-04                   | 1.68E-03              | 2.12E-04           |
| DMF             | kg             | 2.47E-03 | 2.70E-06                                      | 1.28E-09                       | 1.78E-05                                  | 2.16E-05                                   | 4.54E-05                                           | 4.54E-05                                | 5.45E-05                                 | 1.91E-05                          | 2.84E-04                   | 1.26E-03              | 5.34E-04           |
| NMP             | kg             | 5.67E-04 | -1.75E-07                                     | 2.93E-10                       | 5.72E-06                                  | 9.95E-06                                   | 1.44E-05                                           | 2.52E-06                                | 2.22E-05                                 | 1.55E-04                          | 1.28E-04                   | 2.07E-04              | 5.31E-04           |
| Spiro-OMeTAD    | kg             | 7.74E-04 | 7.42E-06                                      | 8.00E-09                       | 4.80E-04                                  | 3.39E-04                                   | 4.63E-04                                           | 9.61E-05                                | 1.26E-03                                 | 2.79E-04                          | 4.94E-03                   | 3.87E-02              | 3.47E-03           |
| LiTFSI          | kg             | 9.70E-05 | 6.14E-07                                      | 5.12E-10                       | 8.76E-06                                  | 1.28E-05                                   | 2.76E-05                                           | 3.41E-06                                | 3.46E-05                                 | 8.80E-06                          | 1.71E-04                   | 1.38E-03              | 1.80E-04           |
| Acetonitrile    | kg             | 3.89E-04 | 1.62E-07                                      | 7.75E-11                       | 2.43E-06                                  | 3.67E-06                                   | 1.03E-05                                           | 9.58E-07                                | 3.82E-06                                 | 3.68E-06                          | 4.77E-05                   | 1.32E-04              | 1.20E-04           |
| Chlorobenzene   | kg             | 1.18E-02 | 3.00E-06                                      | 8.42E-09                       | 9.78E-05                                  | 2.60E-04                                   | 1.75E-04                                           | 2.25E-05                                | 3.20E-04                                 | 1.00E-04                          | 1.46E-03                   | 5.45E-03              | 2.53E-03           |
| tBP             | kg             | 2.84E-04 | 4.24E-07                                      | 7.97E-10                       | 8.16E-06                                  | 9.01E-06                                   | 1.60E-05                                           | 2.94E-06                                | 2.58E-05                                 | 9.26E-06                          | 1.30E-04                   | 5.36E-04              | 1.36E-04           |
| Silver          | kg             | 2.50E-03 | 2.75E-04                                      | 7.40E-08                       | 3.15E-03                                  | 1.05E-02                                   | 1.01E-02                                           | 6.52E-04                                | 4.74E-02                                 | 1.07E-02                          | 1.92E-01                   | 7.75E+00              | 1.83E-01           |

Percentage of Each Material in Cumulative Energy Demand (MJ-Eq)

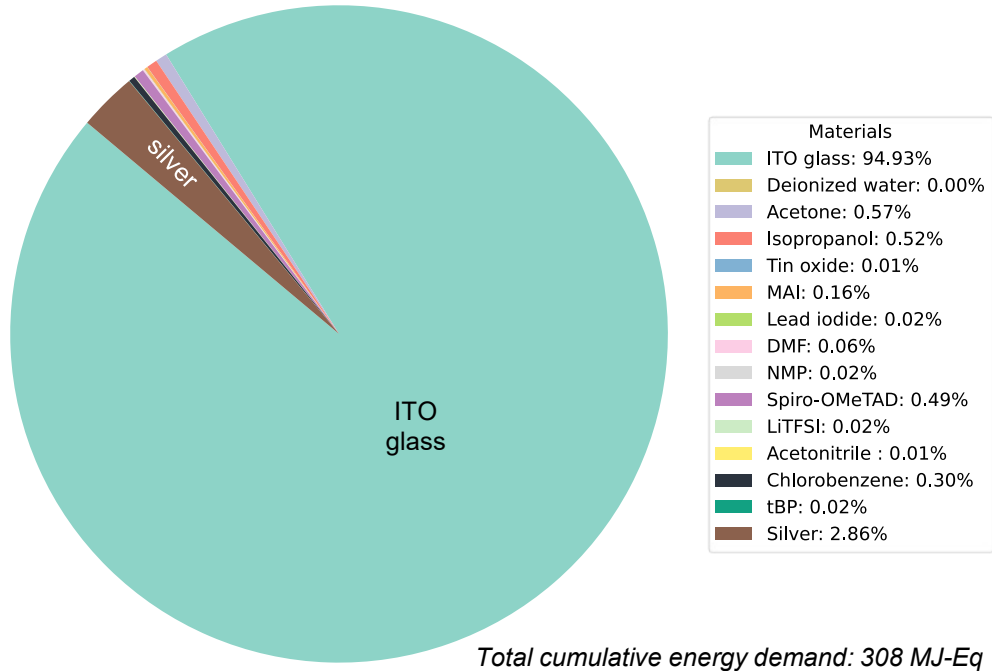

Figure S12: Cumulative energy demand composition of virgin materials required for a 1 m<sup>2</sup> module.

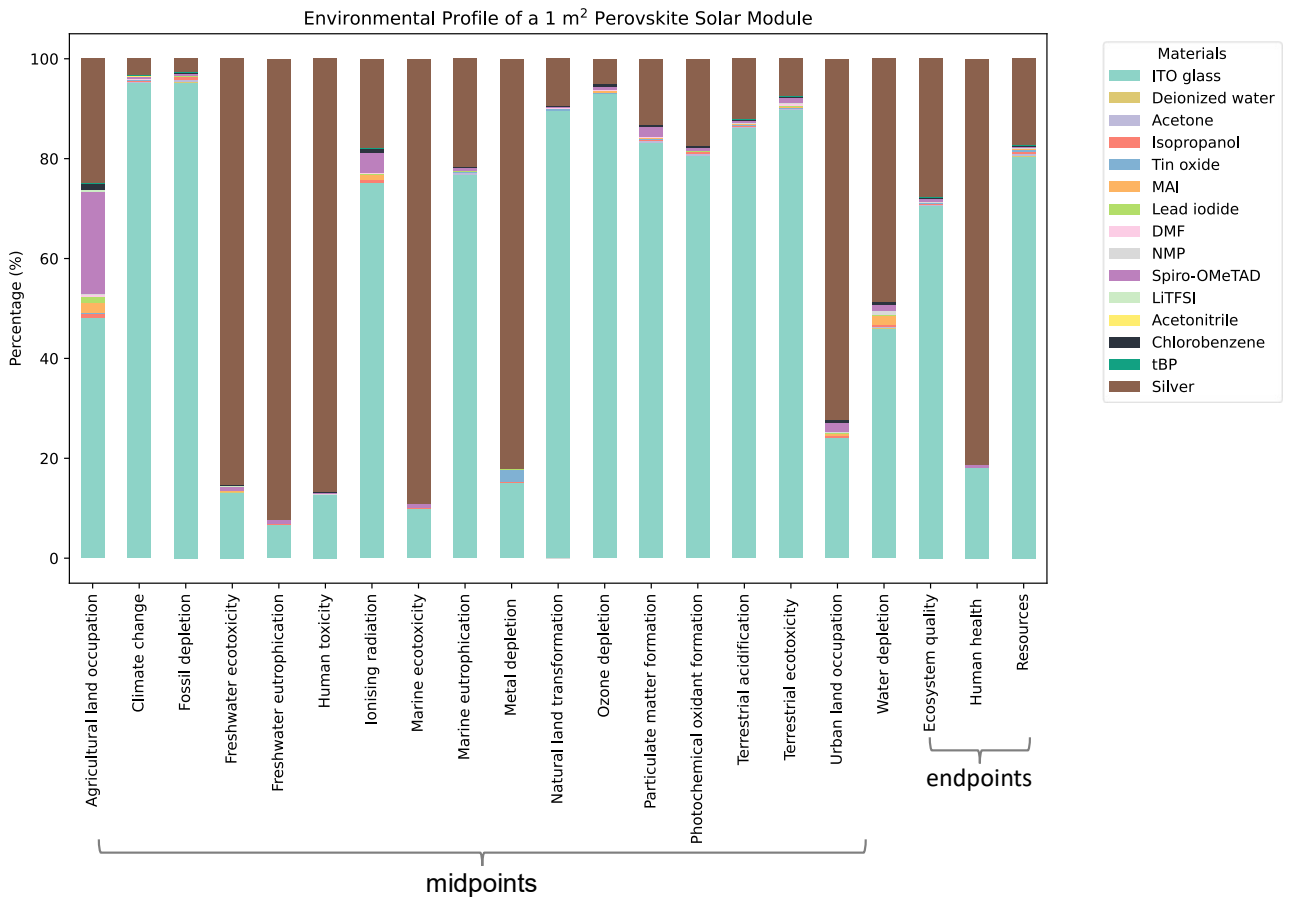

Figure S13: Environmental profile of a 1 m<sup>2</sup> module.

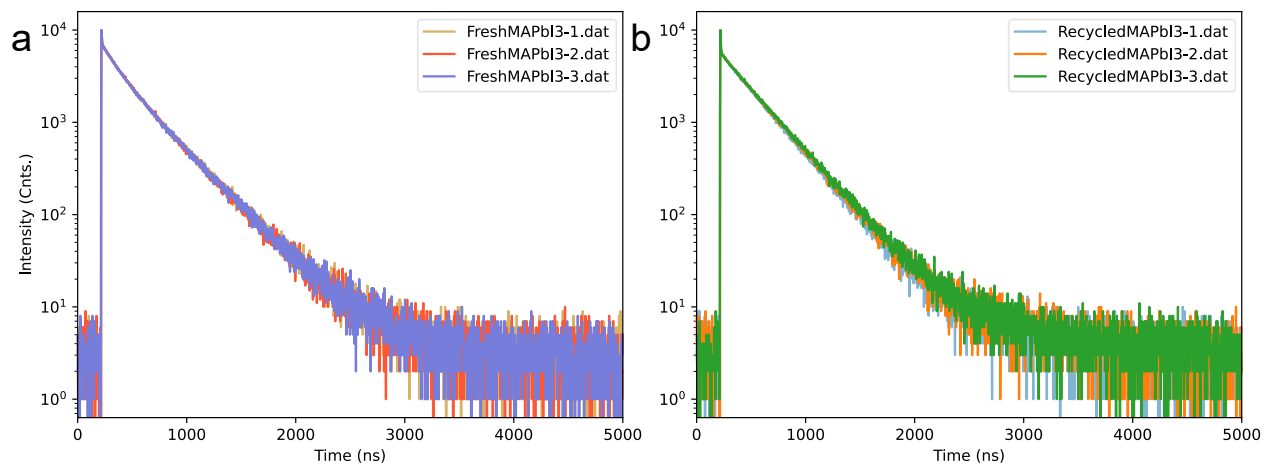

**Figure S14:** TR-PL spectra for a) fresh MAPbI<sub>3</sub> and b) recycled MAPbI<sub>3</sub>, each measured three times consecutively at the same spot.

There are two primary uncertainty sources for PCE:

- 1) Discrepancy between the designed electrode area and the actual area. Table S12 displays the designed electrode area and the areas measured from optical microscope images (Figure S15). Analysis of their differences indicates an average deviation of  $1.14\% \pm 0.55\%$ , leading to electrode areas ranging from 98.31% to 101.69% of the designed area. Since PCE inversely correlates with electrode area according to Equation (4), the area discrepancies imply that the real PCE could diverge from the measured values, potentially being up to 1.66% lower or 1.72% higher.

$$PCE(\%) = \frac{P_{out}}{P_{in}} * 100 = \frac{J_{max} * V_{max}}{P_{in}} * 100 = \frac{I_{max} * V_{max}}{Area * P_{in}} * 100 \quad (4)$$

- 2) JV measurement setup uncertainty. To determine the uncertainty of the setup, we conducted ten JV characteristic measurements of an OPV cell. We chose OPV cells for their superior stability compared to perovskite solar cells. The PCE results revealed a coefficient of variation of 2.72%.

The overall uncertainty, calculated using the root of the sum of squares (RSS) method, is 3.22%. This calculation excludes the smaller 1.66% deviation from electrode area discrepancies to avoid double counting the same source of uncertainty. Consequently, the actual PCE is estimated to be within 3.22% less or more than the measured PCE.

**Table S12:** Measured electrode area of four cells versus the designed area.

|                                | designed | Cell 1  | Cell 2  | Cell 3  | Cell 4  |
|--------------------------------|----------|---------|---------|---------|---------|
| Total area ( $\mu\text{m}^2$ ) | 6296792  | 6196054 | 6321202 | 6392110 | 6363482 |

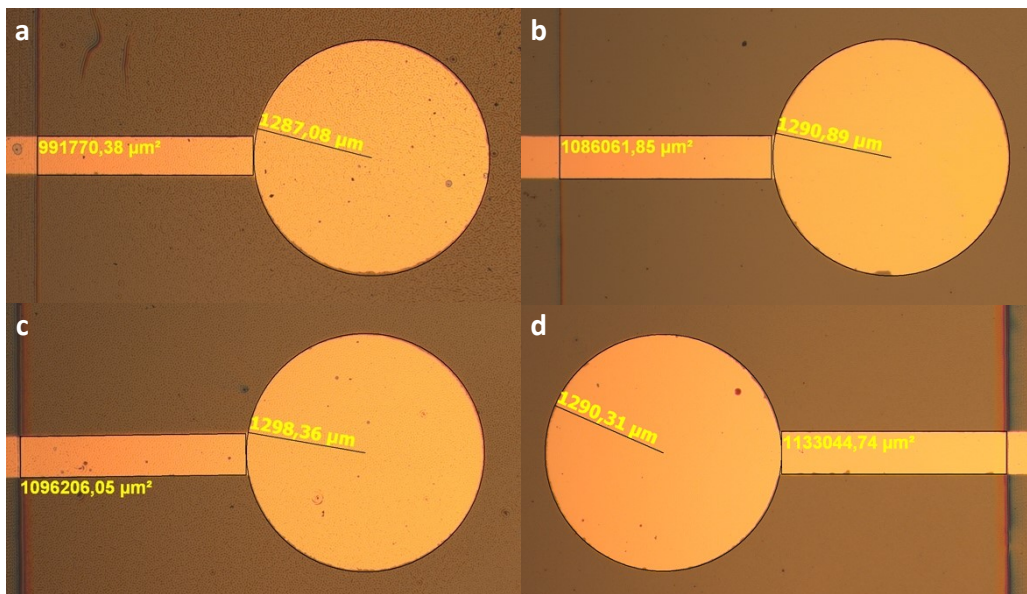

**Figure S15:** Optical microscope images of 4 solar cells.

## References

- [1] Byeong Jo Kim, Dong Hoe Kim, Seung Lee Kwon, So Yeon Park, Zhen Li, Kai Zhu, and Hyun Suk Jung. Selective Dissolution of Halide Perovskites as a Step Towards Recycling Solar Cells. *Nature Communications*, 7(1):11735, 2016.
- [2] Jeannette M. Kadro, Norman Pellet, Fabrizio Giordano, Alexey Ulianov, Othmar Müntener, Joachim Maier, Michael Grätzel, and Anders Hagfeldt. Proof-of-concept for Facile Perovskite Solar Cell Recycling. *Energy & Environmental Science*, 9(10):3172–3179, 2016.
- [3] Like Huang, Ziyang Hu, Jie Xu, Xiaoxiang Sun, Yangyang Du, Jian Ni, Hongkun Cai, Juan Li, and Jianjun Zhang. Efficient Electron-transport Layer-free Planar Perovskite Solar Cells via Recycling the FTO/glass Substrates from Degraded Devices. *Solar Energy Materials and Solar Cells*, 152:118–124, 2016.
- [4] Valentina Larini, Changzeng Ding, Fabiola Faini, Giovanni Pica, Giovanna Bruni, Lorenzo Pancini, Silvia Cavalli, Matteo Manzi, Matteo Degani, Riccardo Pallotta, Michele De Bastiani, Chang-Qi Ma, and Giulia Grancini. Sustainable and Circular Management of Perovskite Solar Cells via Green Recycling of Electron Transport Layer-Coated Transparent Conductive Oxide. *Advanced Functional Materials*, 2306040, 2023.
- [5] Jie Xu, Ziyang Hu, Like Huang, Xiaokun Huang, Xianyu Jia, Jing Zhang, Jianjun Zhang, and Yuejin Zhu. In situ Recycle of  $\text{PbI}_2$  as a Step Towards Sustainable Perovskite Solar Cells. *Progress in Photovoltaics: Research and Applications*, 25(12):1022–1033, 2017.
- [6] Bo Chen, Chengbin Fei, Shangshang Chen, Hangyu Gu, Xun Xiao, and Jinsong Huang. Recycling Lead and Transparent Conductors from Perovskite Solar Modules. *Nature Communications*, 12(1):5859, 2021.
- [7] Sheng Zhang, Lili Shen, Mianji Huang, Yu Yu, Lei Lei, Jun Shao, Qingbao Zhao, Zihua Wu, Jinmin Wang, and Songwang Yang. Cyclic Utilization of Lead in Carbon-Based Perovskite Solar Cells. *ACS Sustainable Chemistry & Engineering*, 6: 7558–7564, 2018.
- [8] Andreas Binek, Michiel L. Petrus, Niklas Huber, Helen Bristow, Yinghong Hu, Thomas Bein, and Pablo Docampo. Recycling Perovskite Solar Cells to Avoid Lead Waste. *ACS Applied Materials & Interfaces*, 8(20):12881–12886, 2016.
- [9] Xiyuan Feng, Qing Guo, Jingwei Xiu, Zhiqin Ying, Kar Wei Ng, Limin Huang, Shuangpeng Wang, Hui Pan, Zikang Tang, and Zhubing He. Close-loop Recycling of Perovskite Solar Cells through Dissolution-recrystallization of Perovskite by Butylamine. *Cell Reports Physical Science*, 2(2), 2021.
- [10] Kai Wang, Tao Ye, Xu Huang, Yuchen Hou, Jungjin Yoon, Dong Yang, Xiaowen Hu, Xiaofang Jiang, Congcong Wu, Guofu Zhou, et al. “One-key-reset” Recycling of Whole Perovskite Solar Cell. *Matter*, 4(7):2522–2541, 2021.
- [11] Nathan L. Chang, Anita Wing Yi Ho-Baillie, Doojin Vak, Mei Gao, Martin A. Green, Renate J. Egan. Manufacturing cost and market potential analysis of demonstrated roll-to-roll perovskite photovoltaic cell processes. *Solar Energy Materials and Solar Cells*, 174: 314-324, 2018.
- [12] Sara Mattiello, Giulia Lucarelli, Adiel Calascibetta, Lorenzo Polastri, Erika Ghiglietti, Suresh Kumar Podapangi, Thomas M. Brown, Mauro Sassi, and Luca Beverina. Sustainable, Efficient, and Scalable Preparation of Pure and Performing Spiro-OMeTAD for Perovskite Solar Cells. *ACS Sustainable Chemistry & Engineering*, 10: 4750-4757, 2022.
- [13] Zhaoning Song, Chad L. McElvany, Adam B. Phillips, Ilke Celik, Patrick W. Krantz, Suneth C. Wathage, Geethika K. Liyanage, Defne Apul and Michael J. Heben. A technoeconomic analysis of

perovskite solar module manufacturing with low-cost materials and techniques. *Energy & Environmental Science*, 10: 1297, 2017.

- [14] Nathan L. Chang, Anita Wing Yi Ho-Baillie, Paul A. Basore, Trevor L. Young, Rhett Evans and Renate J. Egan. A Manufacturing Cost Estimation Method with Uncertainty Analysis and its Application to Perovskite on Glass Photovoltaic Modules. *Progress in Photovoltaics*, 25(5): 390–405, 2017.
- [15] Zongqi Li, Yingzhi Zhao, Xi Wang, Yuchao Sun, Zhiguo Zhao, Yujing Li, Huanping Zhou, and Qi Chen. Cost Analysis of Perovskite Tandem Photovoltaics. *Joule*, 2(8): 1559-1572, 2018.
- [16] Xueyu Tian, Samuel D. Stranks, and Fengqi You. Life Cycle Assessment of Recycling Strategies for Perovskite Photovoltaic Modules. *Nature Sustainability*, 4: 821–829, 2021.
